# Supplementary material for: Increasing Charge Carrier Mobility through Modifications of Terminal Groups of Y6: A Theoretical Study
Source: MDPI journal article supplement (doi:10.3390/ijms24108610), 2023-05-11
Supplement: s1 [file s1]

**SI:**

# Increasing charge carrier mobility through modifications of terminal groups of Y6: a theoretical study

Yunjie Xiang\*, Chunlin Xu and Shaohui Zheng\*

School of Materials and Energy

Chongqing Key Laboratory for Advanced Materials and Technologies of Clean Energies

Southwest University, Chongqing, China

Corresponding author: hao1986kx88@swu.edu.cn; shaohuizheng@swu.edu.cn

Table S1. Calculated excited states and oscillator strength of Y6-NO<sub>2</sub>, Y6, Y6-IN, Y6-ERHD and Y6-CAO in film by using  $\omega$ B97X functional.

|                    | Excited State   | Energy (eV) | $\lambda$ (nm) | Oscillator strength |
|--------------------|-----------------|-------------|----------------|---------------------|
| Y6-NO <sub>2</sub> | 1               | 1.4519      | 853.93         | 0.8588              |
|                    | 2               | 1.5023      | 825.32         | 0.0073              |
|                    | 3               | 1.6737      | 740.79         | 1.3879              |
|                    | $\lambda_{ave}$ | 1.5813      | 784.17         | 2.2540              |
| Y6                 | 1               | 1.6595      | 747.1          | 2.1413              |
|                    | 2               | 1.9479      | 636.5          | 0.1146              |
|                    | $\lambda_{ave}$ | 1.6723      | 741.48         | 2.2559              |
| Y6-IN              | 1               | 1.9190      | 646.09         | 1.8378              |
|                    | $\lambda_{ave}$ | 1.9190      | 646.09         | 1.8378              |
| Y6-ERHD            | 1               | 1.8833      | 658.32         | 1.6356              |
|                    | 2               | 2.223       | 557.73         | 0.2408              |
|                    | $\lambda_{ave}$ | 1.9213      | 645.41         | 1.8764              |
| Y6-CAO             | 1               | 2.0621      | 601.25         | 1.7158              |
|                    | $\lambda_{ave}$ | 2.0621      | 601.25         | 1.7158              |

Table S2. Binding energies and the geometry center distances ( $D_{GC}$ ) of Y6-NO<sub>2</sub>, Y6, Y6-IN, Y6-ERHD and Y6-CAO based dimers with M-configuration obtained by WB97XD with 6-31G (d) basis set in dibutylether ( $\epsilon=3.0$ ). Unit: kJ/mol for binding energy; Å for  $D_{GC}$ .

| System              | Binding energy | $D_{GC}$ |
|---------------------|----------------|----------|
| 2Y6-NO <sub>2</sub> | 112.62         | 18.63    |
| 2Y6                 | 116.87         | 19.49    |
| 2 Y6-IN             | 184.57         | 13.37    |
| 2Y6-ERHD            | 160.14         | 12.84    |
| 2Y6-CAO             | 195.73         | 14.84    |

Table S3. Binding energies and the geometry center distances ( $D_{GC}$ ) of Y6-NO<sub>2</sub>, Y6, Y6-IN, Y6-ERHD and Y6-CAO based dimers with S-configuration obtained by WB97XD with 6-31G (d) basis set in dibutylether ( $\epsilon=3.0$ ). Unit: kJ/mol for binding energy; Å for  $D_{GC}$ .

| System              | Binding energy | $D_{GC}$ |
|---------------------|----------------|----------|
| 2Y6-NO <sub>2</sub> | 85.19          | 17.73    |
| 2Y6                 | 147.65         | 14.80    |
| 2 Y6-IN             | 134.18         | 14.93    |
| 2Y6-ERHD            | 127.32         | 13.62    |
| 2Y6-CAO             | 170.94         | 16.06    |

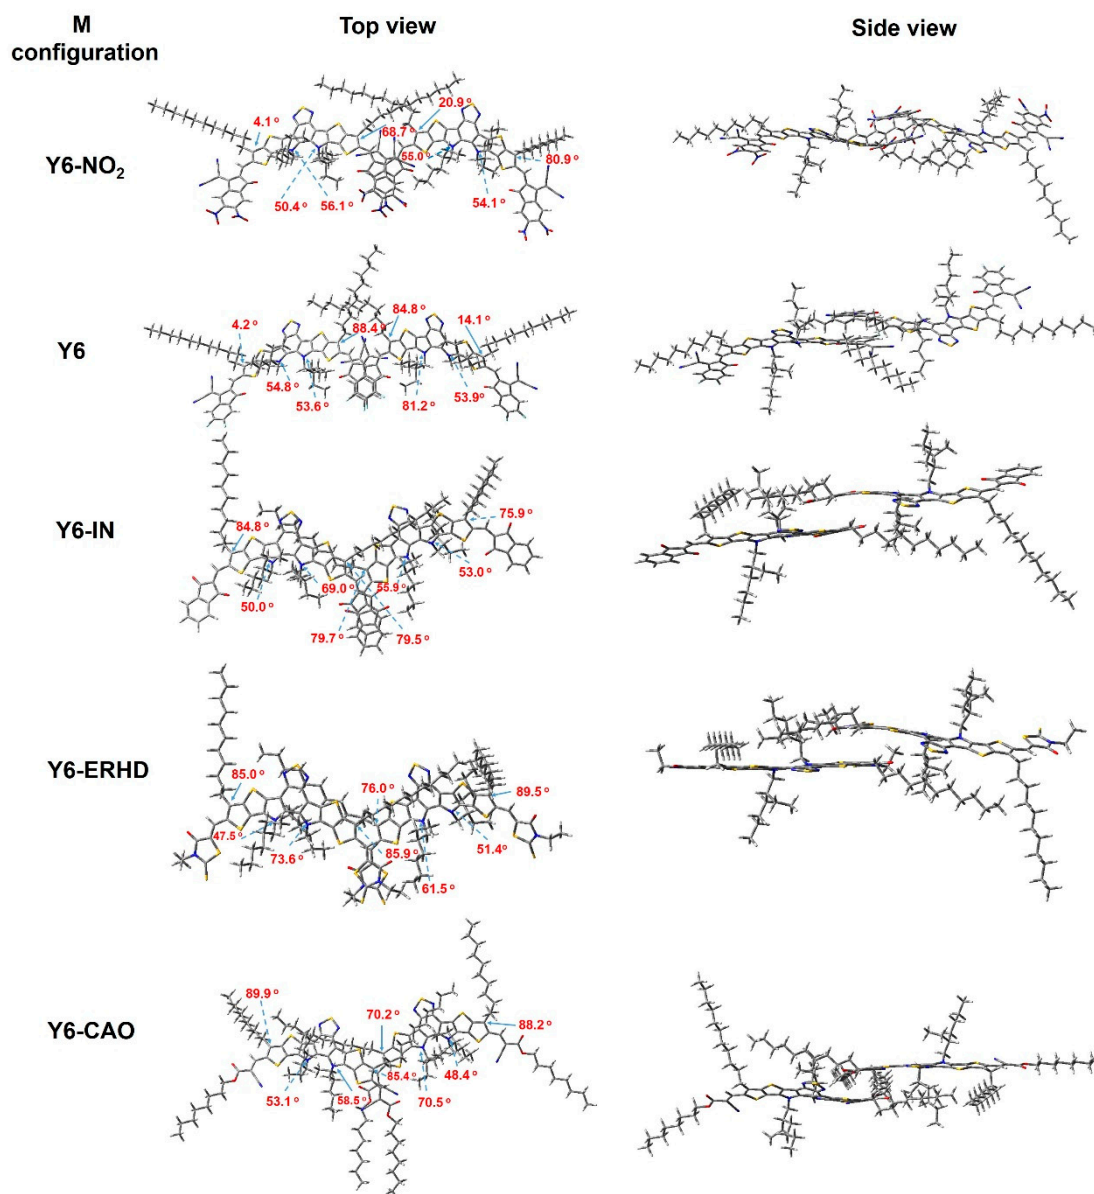

Figure S1. Dihedral angles of side chains of Y6-NO<sub>2</sub>, Y6, Y6-IN, Y6-ERHD and Y6-CAO dimer with M configuration.

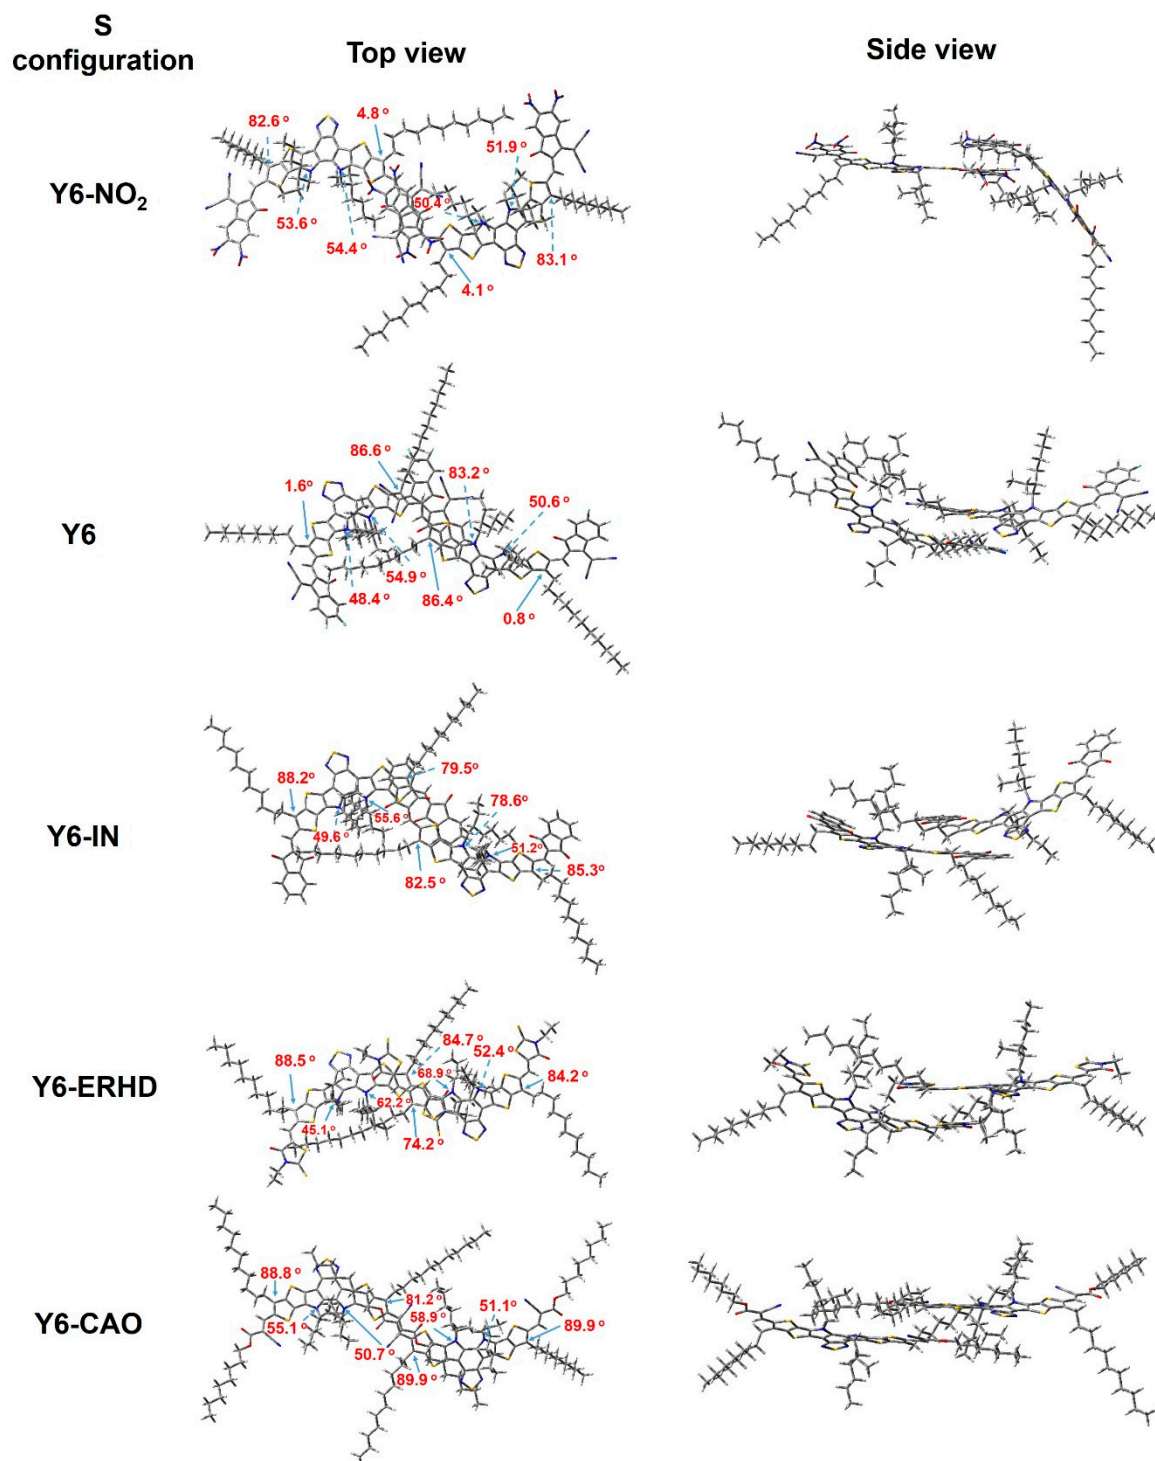

Figure S2. Dihedral angles of side chains of Y6-NO<sub>2</sub>, Y6, Y6-IN, Y6-ERHD and Y6-CAO dimer with S configuration.

Table S4. Charge transfer distance ( $r$ , in Å), absolute value of electronic coupling ( $|V_e|$  in meV), charge transfer rate constant ( $k_e$ , in  $s^{-1}$ ), reorganization energy ( $\lambda$ , in eV) of electron transfer, charge carrier mobility ( $\mu_e$ , in  $cm^2 V^{-1} s^{-1}$ ) of another dimer of Y6-NO<sub>2</sub>, Y6, Y6-IN, Y6-ERHD and Y6-CAO.

|                              | $r$   | $ V_e $ | $\lambda$ | $k_e$                 | $\mu_e$               |
|------------------------------|-------|---------|-----------|-----------------------|-----------------------|
| Y6-NO <sub>2</sub> - S-dimer | 17.73 | 8.11    | 0.33      | $7.91 \times 10^{10}$ | $4.80 \times 10^{-2}$ |
| Y6-M-dimer                   | 19.49 | 53.73   | 0.33      | $3.43 \times 10^{12}$ | $2.54 \times 10^0$    |
| Y6-IN-S-dimer                | 14.93 | 10.59   | 0.37      | $8.83 \times 10^{10}$ | $3.80 \times 10^{-2}$ |
| Y6-ERHD-S-dimer              | 13.62 | 9.56    | 0.34      | $9.34 \times 10^{10}$ | $3.40 \times 10^{-2}$ |
| Y6-CAO-S-dimer               | 16.06 | 23.52   | 0.40      | $3.10 \times 10^{11}$ | $1.56 \times 10^{-1}$ |
